# Supplementary material
Source: Springer Nature journal article supplement (https://www.springermedizin.de/resource/supplementary/12936_2008_800_MOESM4_ESM.pdf/9548956)

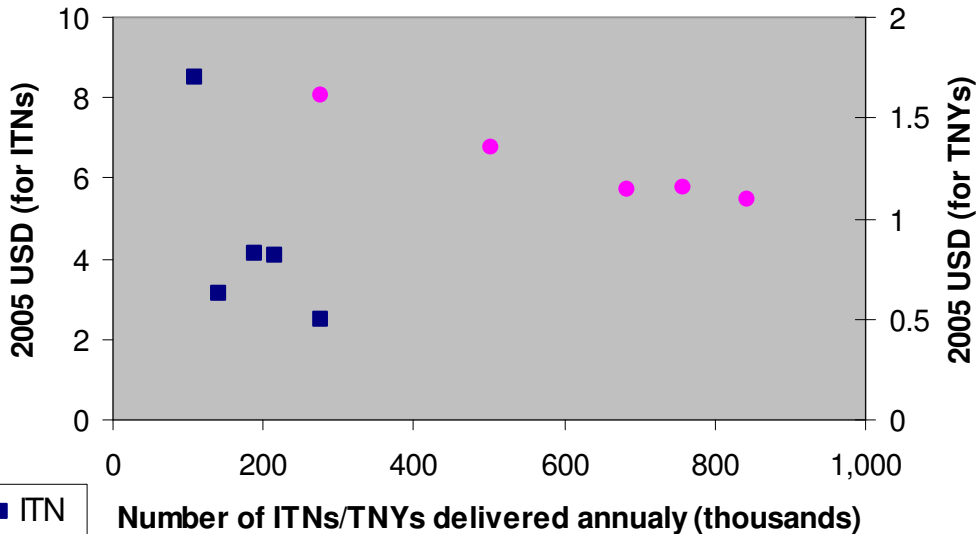

■ ITN  
● TNY

Number of ITNs/TNYs delivered annually (thousands)

Supplement: MOESM4 [file 9548956]
